# Supplementary material for: A structural mechanism for phosphorylation-dependent inactivation of the AP2 complex
Source: eLife journal article supplement (doi:10.7554/elife.50003), 2019-08-29
Supplement: supp [file elife-50003-supp-v1.zip]

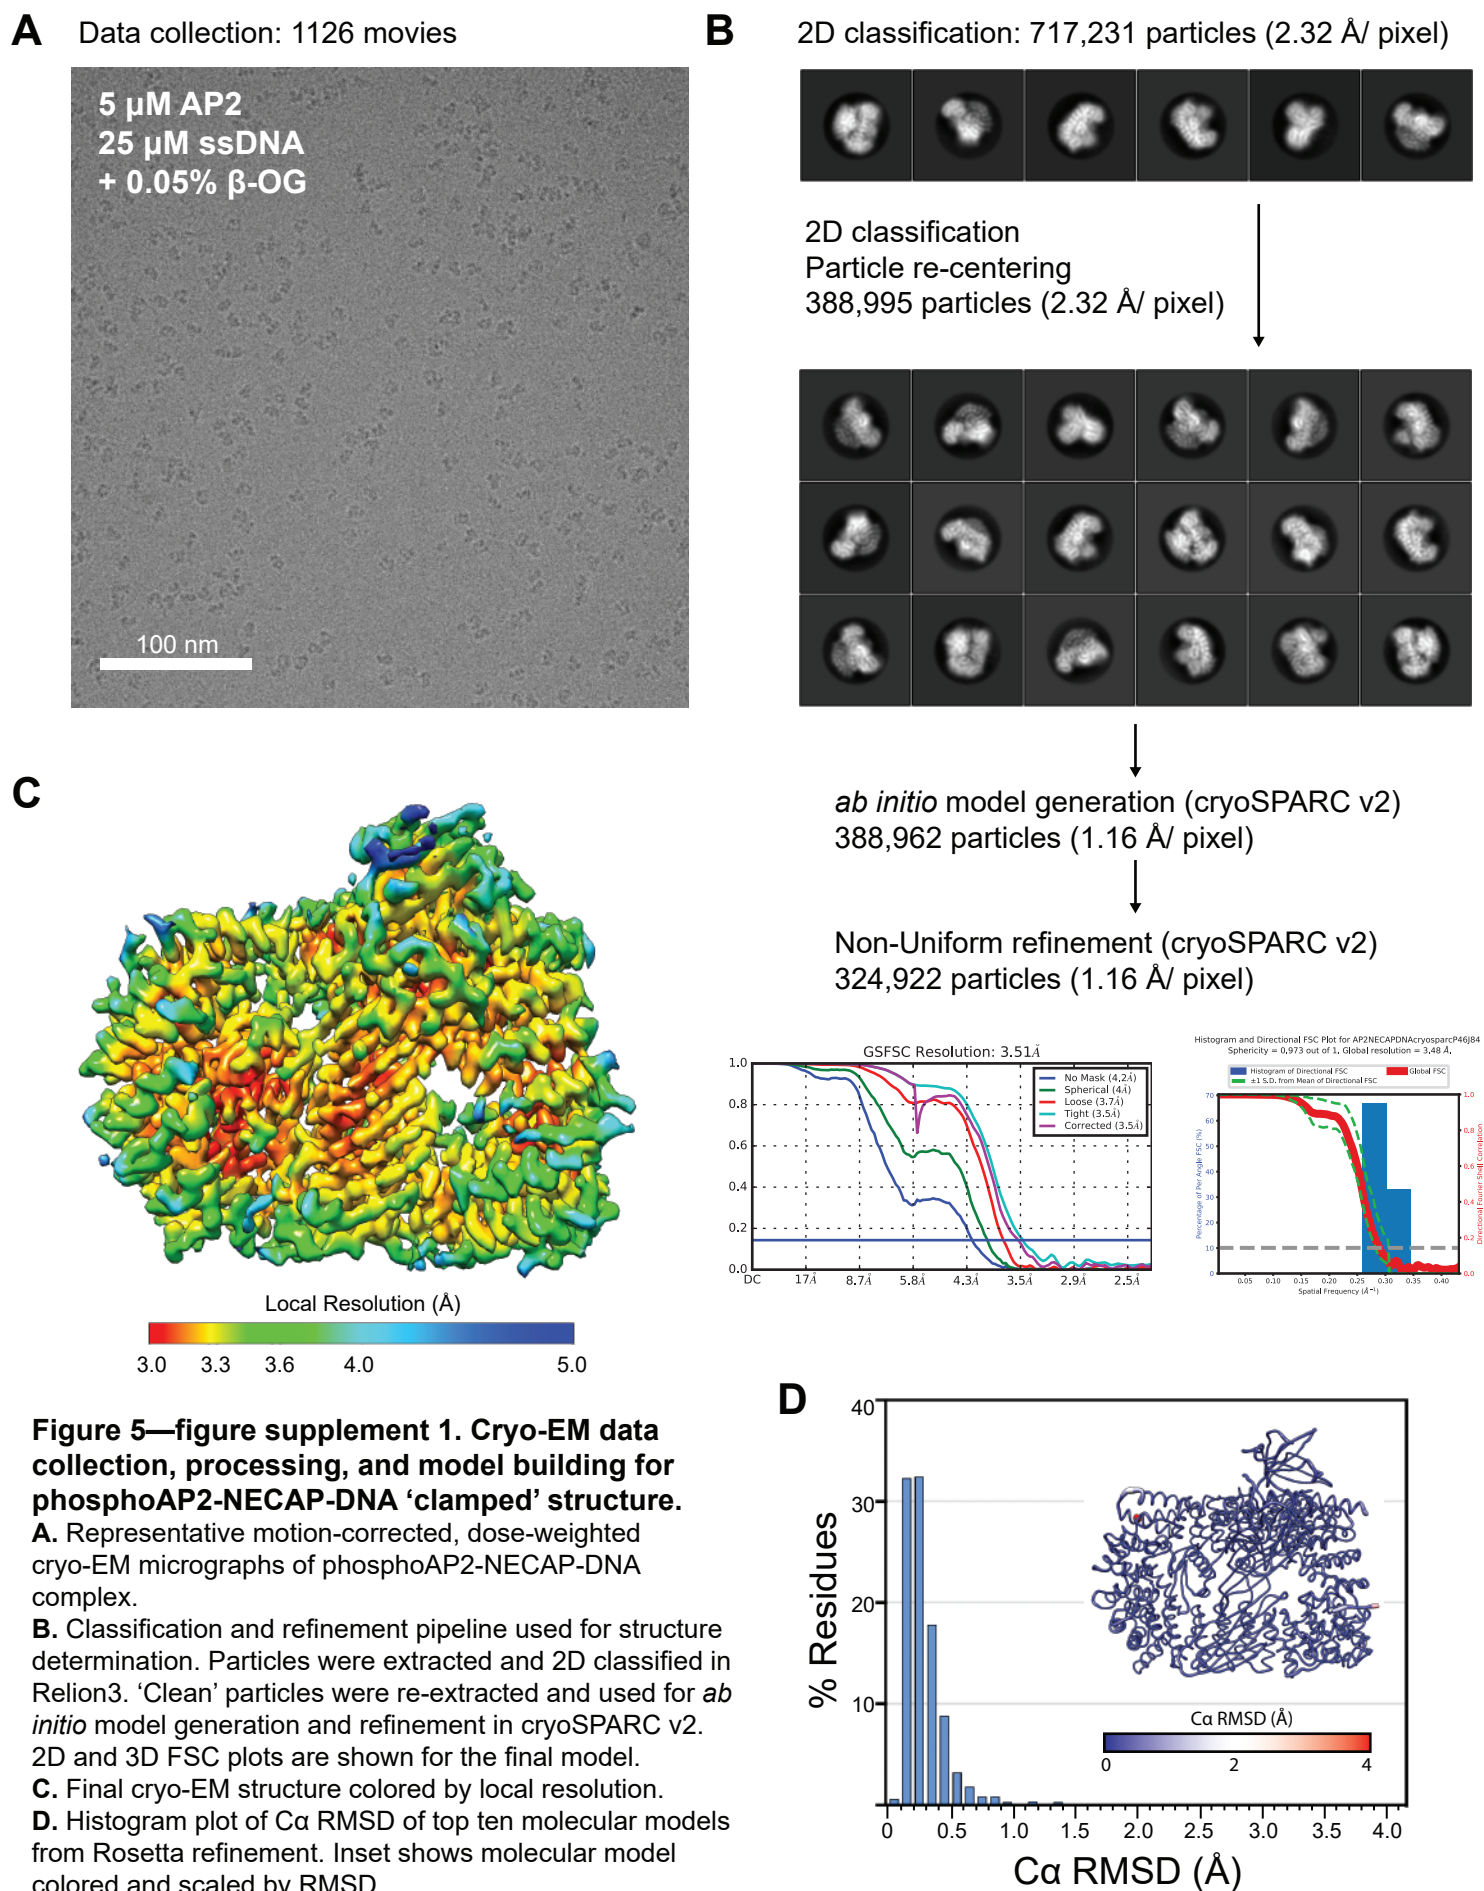

**Figure 5—figure supplement 1. Cryo-EM data collection, processing, and model building for phosphoAP2-NECAP-DNA ‘clamped’ structure.**

**A.** Representative motion-corrected, dose-weighted cryo-EM micrographs of phosphoAP2-NECAP-DNA complex.

**B.** Classification and refinement pipeline used for structure determination. Particles were extracted and 2D classified in Relion3. ‘Clean’ particles were re-extracted and used for *ab initio* model generation and refinement in cryoSPARC v2. 2D and 3D FSC plots are shown for the final model.

**C.** Final cryo-EM structure colored by local resolution.

**D.** Histogram plot of Ca RMSD of top ten molecular models from Rosetta refinement. Inset shows molecular model colored and scaled by RMSD.
