# Supplementary material for: A structural mechanism for phosphorylation-dependent inactivation of the AP2 complex
Source: eLife journal article supplement (doi:10.7554/elife.50003), 2019-08-29
Supplement: supp [file elife-50003-supp-v1.zip]

Archive with 11 entries (11 files):
- elife_poa_e50003_Figure_5_figure_supplement_2.pdf
- elife_poa_e50003_Figure_1_figure_supplement_3.pdf
- elife_poa_e50003_Figure_1_figure_supplement_1.pdf
- elife_poa_e50003_Figure_3_figure_supplement_1.pdf
- elife_poa_e50003_Figure_1_figure_supplement_2.pdf
- elife_poa_e50003_Figure_4_figure_supplement_1.pdf
- elife_poa_e50003_Figure_5_figure_supplement_1.pdf
- elife_poa_e50003_Supplementary_file_2.docx
- elife_poa_e50003_Transparent_Reporting_File.pdf
- elife_poa_e50003_Supplementary_file_1.docx
- elife_poa_e50003_Figure_6_figure_supplement_1.pdf
