# Supplementary material for: A structural mechanism for phosphorylation-dependent inactivation of the AP2 complex
Source: eLife journal article supplement (doi:10.7554/elife.50003), 2019-08-29
Supplement: supp [file elife-50003-supp-v1.zip › elife_poa_e50003_Figure_1_figure_supplement_1.pdf]

**A** 2D classification: 890,658 picks, 2.3 Å/pixel

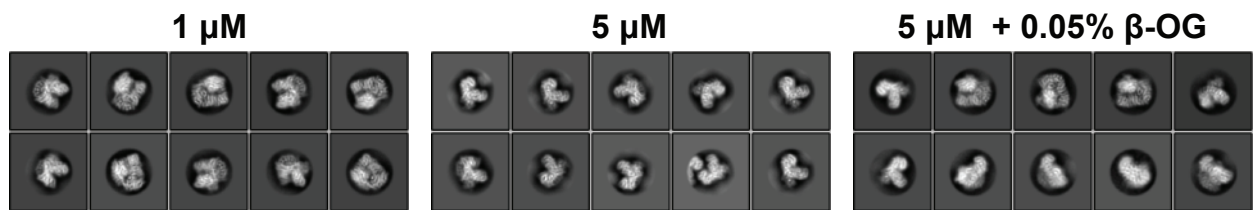

**B** 3D classification (1 class), re-center and re-extract  
3D auto-refine: 490,560 particles

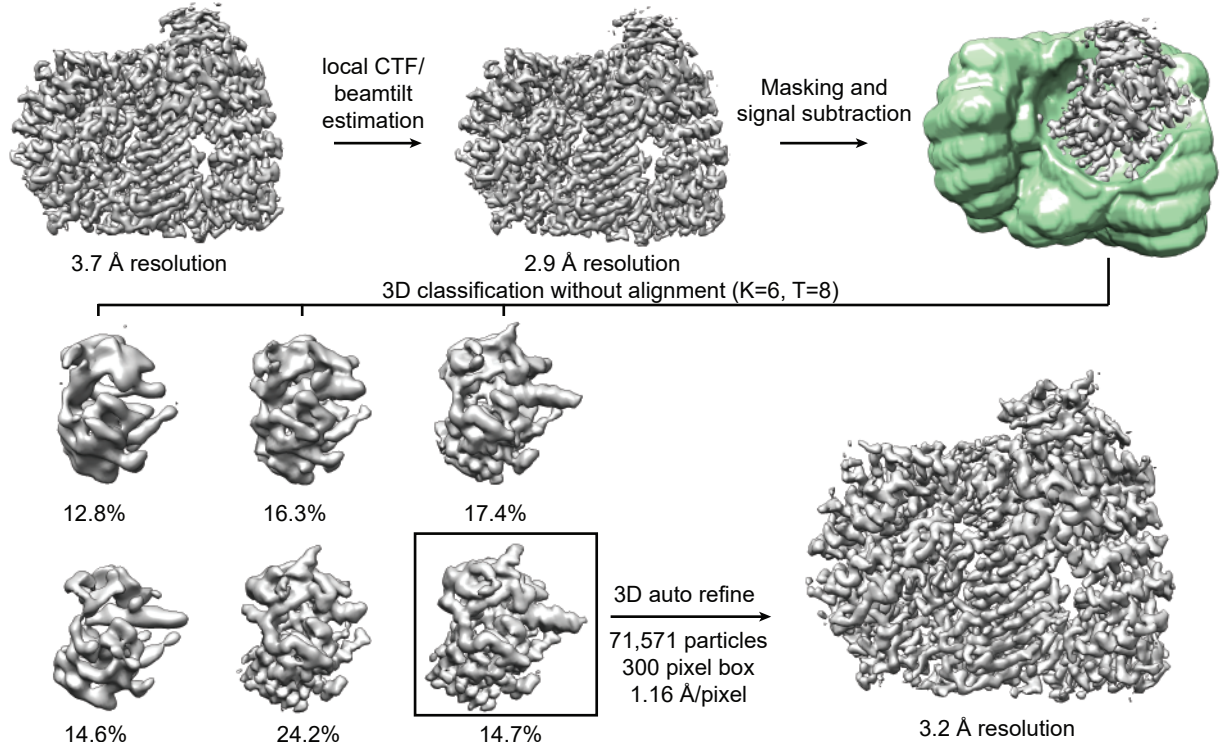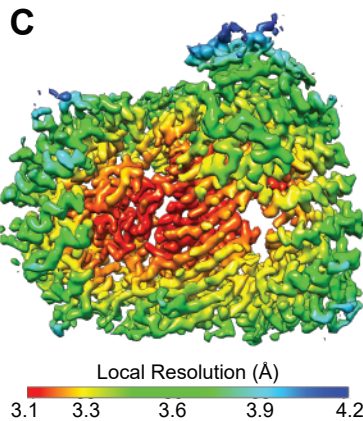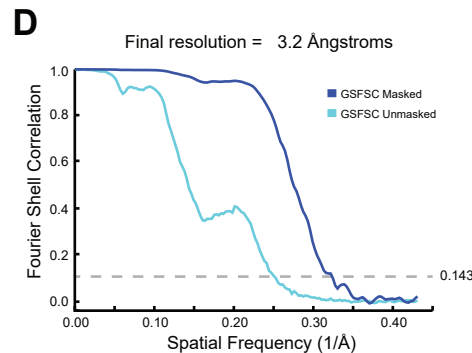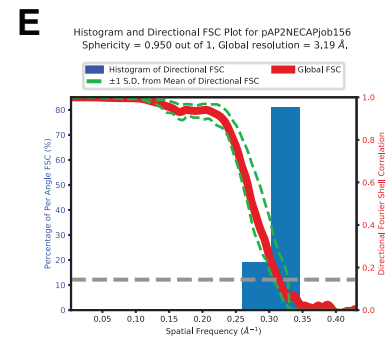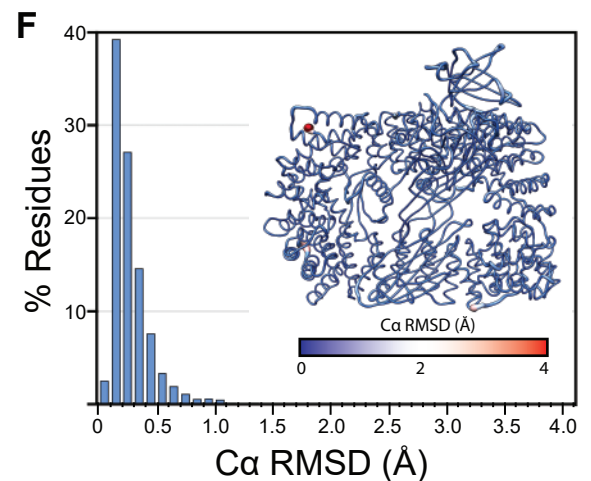

**Figure 1—figure supplement 1. Classification, signal subtraction, and refinement of phosphoAP2 bound to NECAP**

**A.** Representative 2D class averages demonstrating different particle orientation preferences under different grid preparation conditions.

**B.** Processing workflow for 3D classification and refinement of phosphoAP2-NECAP using the Relion 3 software suite.

**C.** Cryo-EM map colored by local resolution (Relion 3).

**D.** Fourier Shell Correlation (FSC) plot

**E.** 3D FSC plot. An overall sphericity of 0.95 shows that resolution is nearly uniform in three dimensions.

**F.** Histogram plot of Ca RMSD of top ten molecular models from Rosetta refinement. Inset shows molecular model colored and scaled by RMSD.
