# Supplementary material for: A structural mechanism for phosphorylation-dependent inactivation of the AP2 complex
Source: eLife journal article supplement (doi:10.7554/elife.50003), 2019-08-29
Supplement: supp [file elife-50003-supp-v1.zip › elife_poa_e50003_Figure_5_figure_supplement_2.pdf]

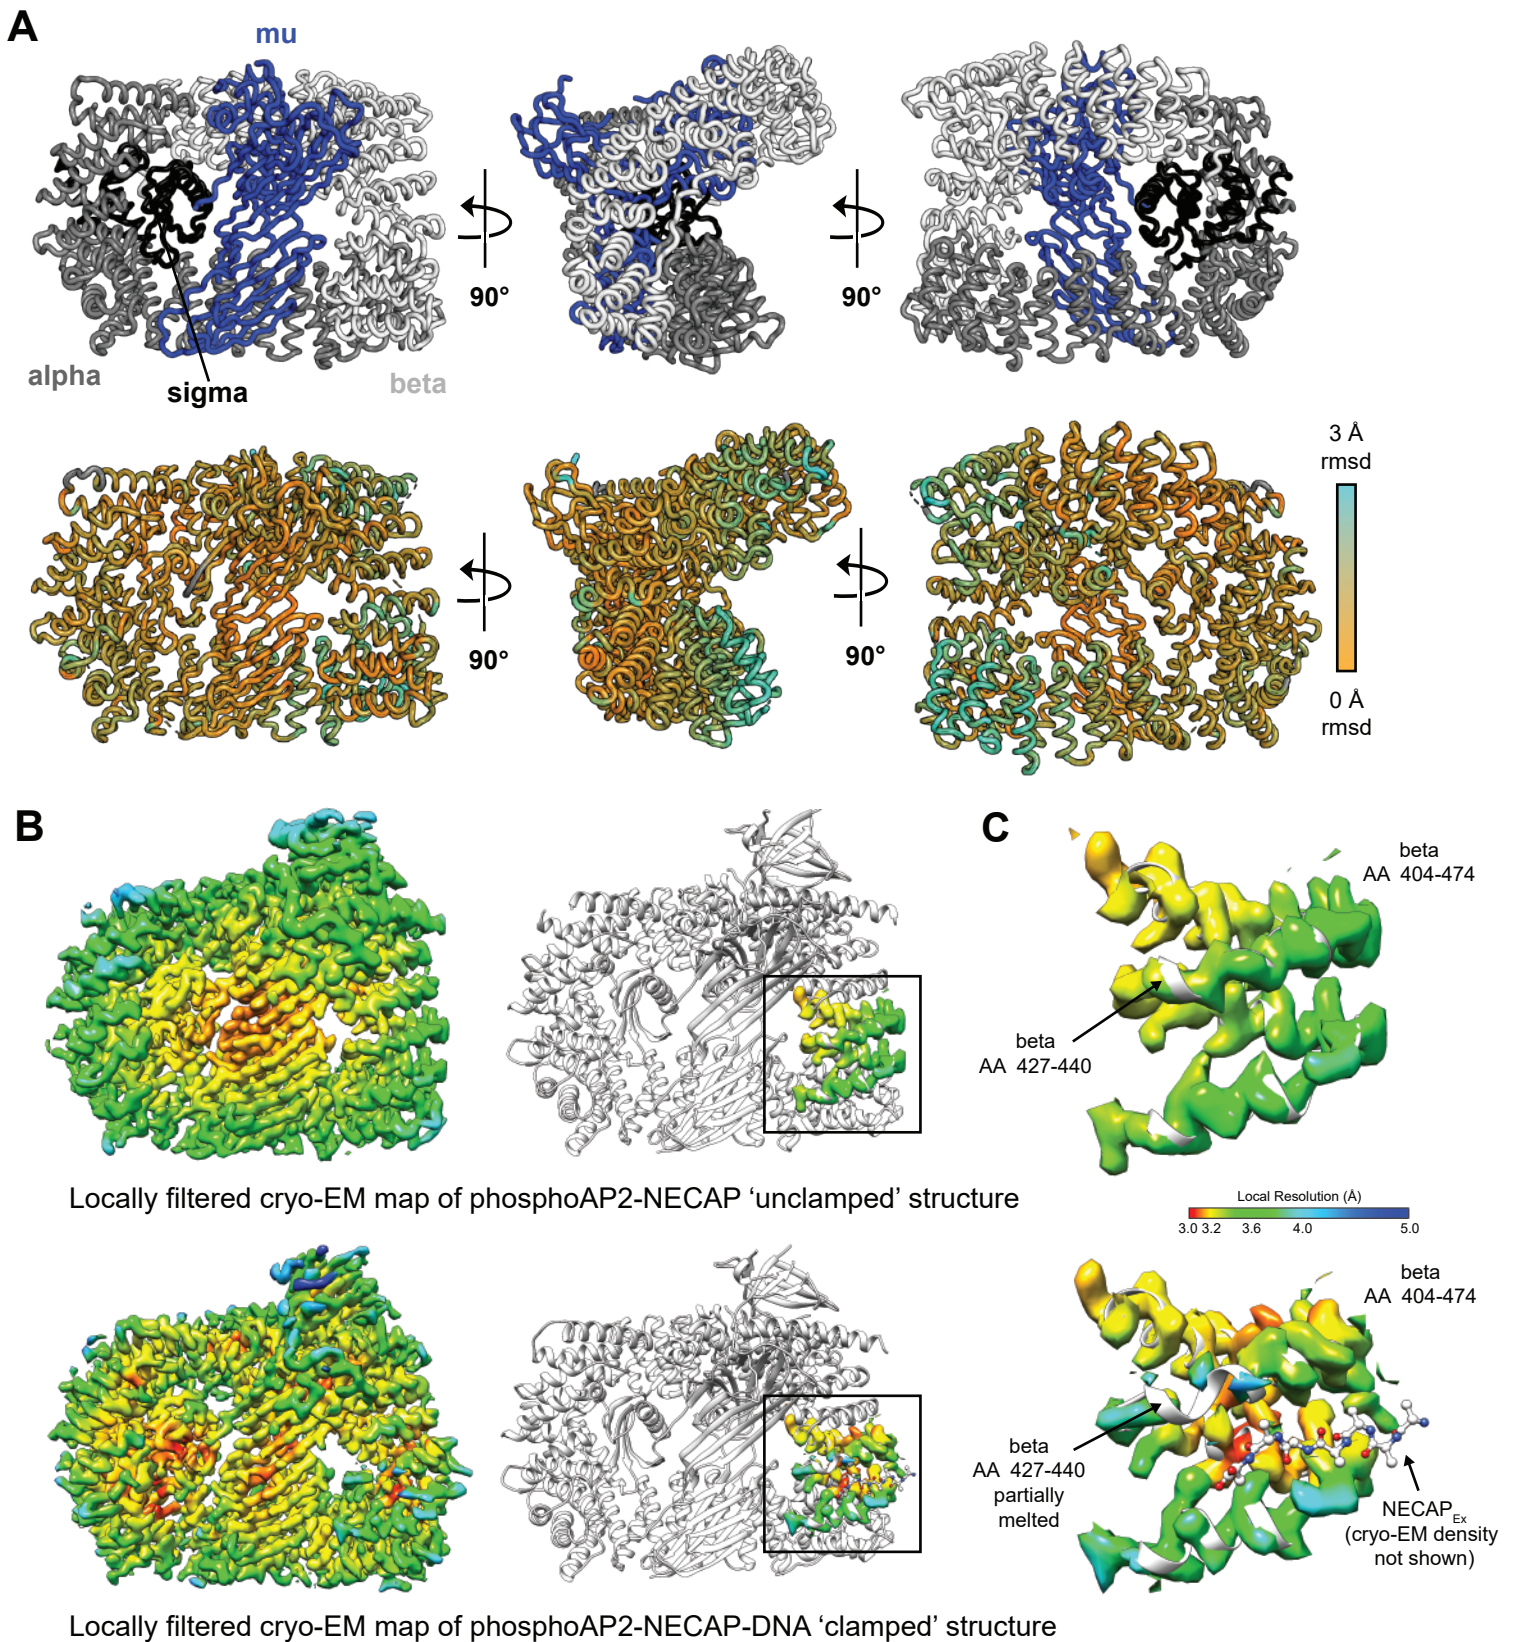

**Figure 5—figure supplement 2. Structural comparison of 'unclamped' and 'clamped' phosphoAP2-NECAP structures**

**A.** Cartoon diagram of phosphoAP2-NECAP 'unclamped' structure. NECAP is not shown. Top: AP2 subunits are colored as labeled. Bottom: AP2 is colored by per-residue RMSD. Values were calculated in PyMol using whole-molecule alignment of 'unclamped' vs 'clamped' phosphoAP2-NECAP.

**B.** Cryo-EM maps of 'unclamped' (top) and 'clamped' (bottom) phosphoAP2-NECAP structures. Maps were locally filtered by local resolution to standardize comparison between maps. Cryo-EM density corresponding to beta AA 404-474 is shown (right). Both maps are colored by local resolution using the same color gradient (color key in (C)).

**C.** The NECAP<sub>Ex</sub> binding site (beta AA 404-474) is shown for the 'unclamped' phosphoAP2-NECAP (top) and 'clamped' phosphoAP2-NECAP (bottom) structures. A small region of beta partially melts when the Ex domain is bound.
