# Supplementary figures and images for: A structural mechanism for phosphorylation-dependent inactivation of the AP2 complex
Source: eLife journal article supplement (doi:10.7554/elife.50003), 2019-08-29

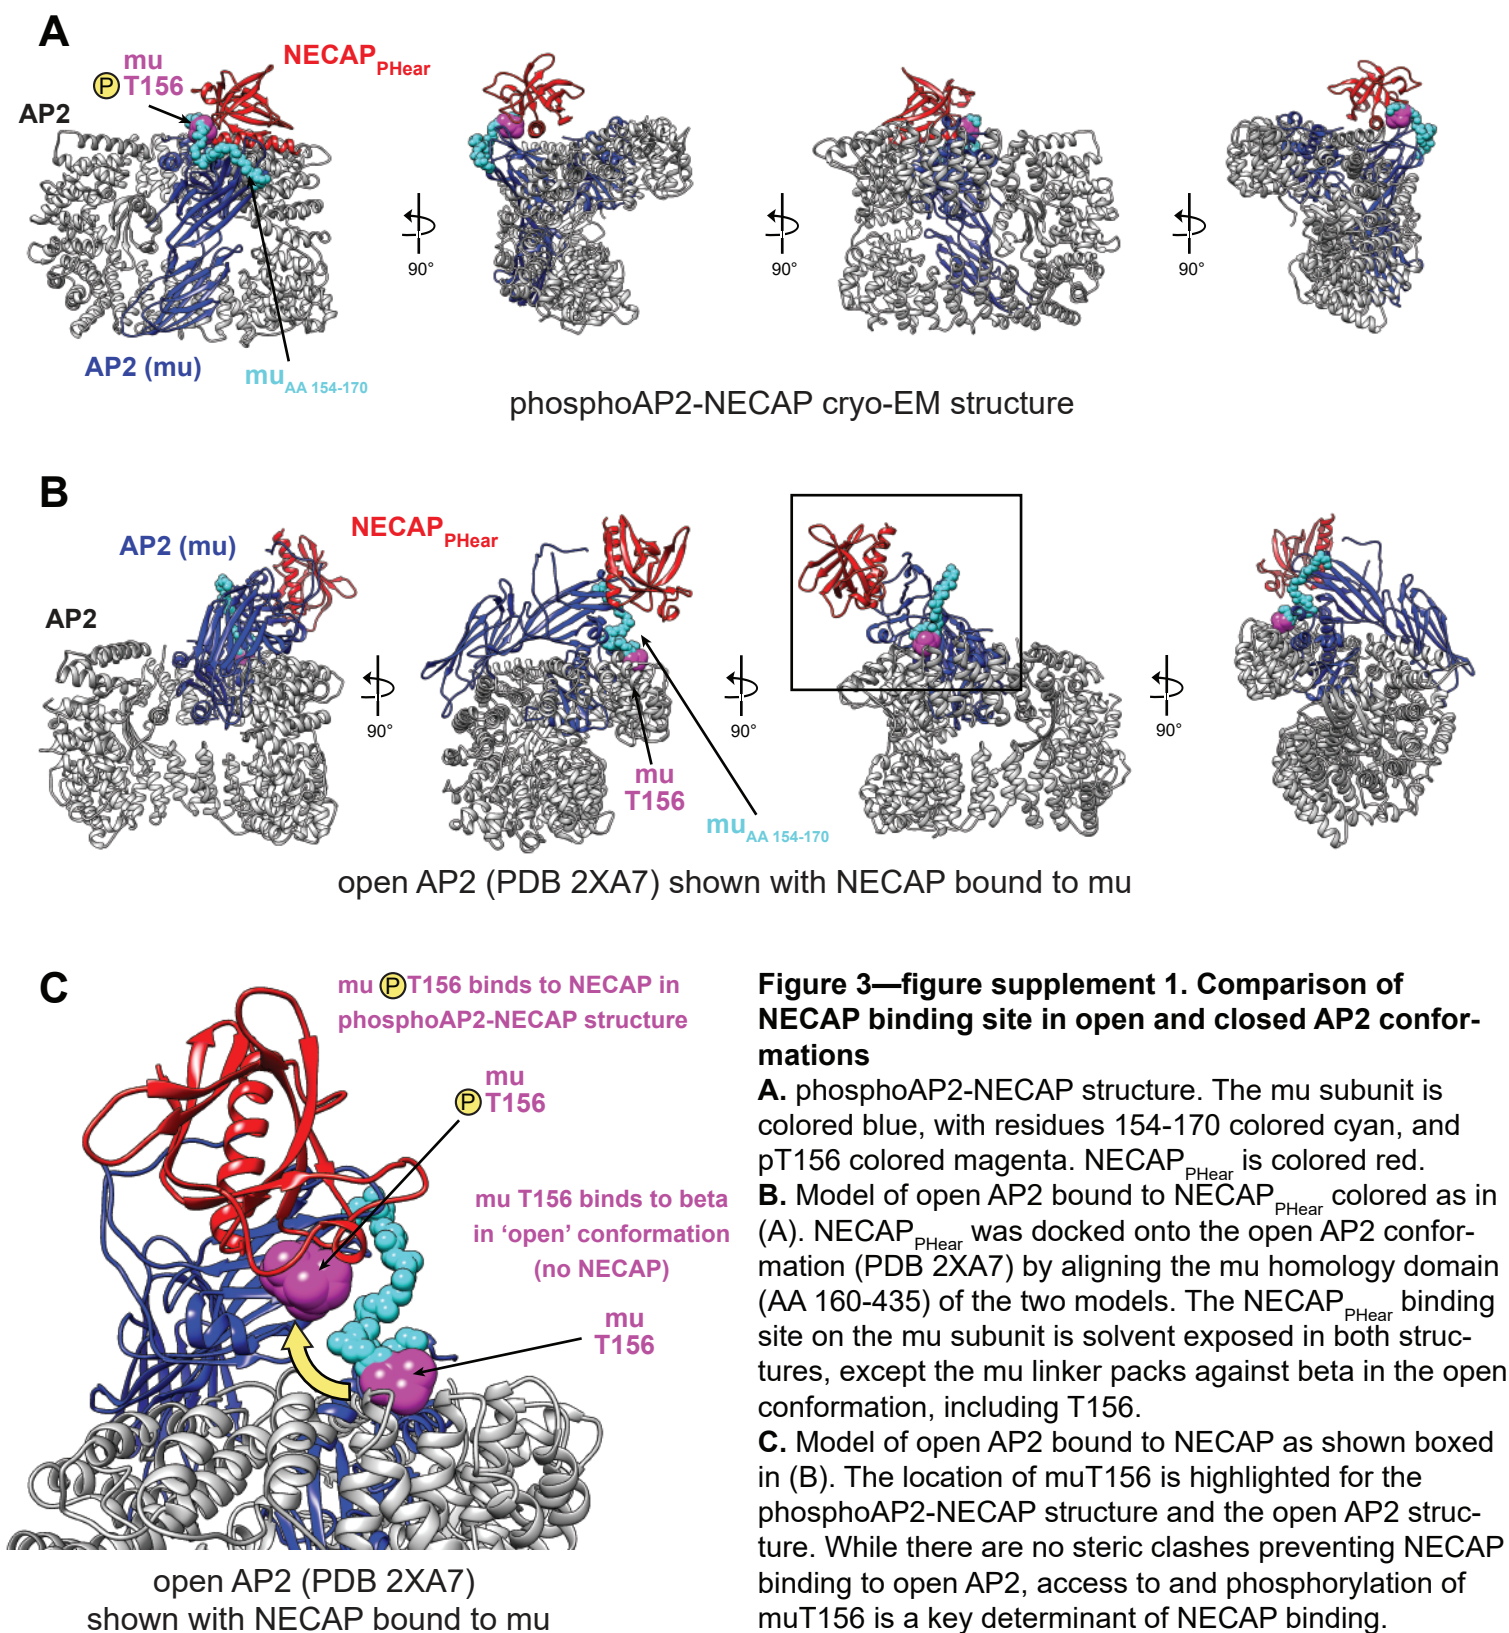

Supplement: supp [file elife-50003-supp-v1.zip › elife_poa_e50003_Figure_3_figure_supplement_1.pdf]
